# Supplementary material for: Liver Elastography in Acute Liver Failure: A Pilot Study
Source: PubMed Central journal article supplement — Crit Care Explor. 2024 Feb 8;6(2):e1048. doi: 10.1097/CCE.0000000000001048 (PMC10857654; doi:10.1097/cce.0000000000001048), 2024-02-08
Supplement: cc9-6-e1048-s001.pdf [file cc9-6-e1048-s001.pdf]

## Liver elastography in acute liver failure: a pilot study

Francesca M Trovato, MD, PhD<sup>1,2,\*</sup>; Florent Artru<sup>1,2</sup>,MD; Rosa Miquel<sup>2</sup>,MD; Tasneem Pirani<sup>1,2</sup>,MD; Mark JW McPhail<sup>1,2</sup>,MD,PhD

<sup>1</sup> School of Immunology and Microbial Sciences, Kings College London, London, UK

<sup>2</sup> Institute of Liver Studies, Kings College Hospital, Denmark Hill, London, UK

\*Corresponding Author

Francesca M Trovato, email: francesca.trovato@kcl.ac.uk

### Supplementary Methods

#### *Cytokine analysis*

The V-PLEX Proinflammatory Panel 1 Human Kit (IFN- $\gamma$ , IL-1 $\beta$ , IL-2, IL-4, IL-6, IL-8, IL-10, IL-12p70, IL-13, TNF- $\alpha$ ) from Meso Scale Diagnostics, LLC was measured as below.

Heparin plasma samples were 4-fold diluted. 50  $\mu$ L of calibrators or sample were added to each well of a V-PLEX plate and incubated for 2 hours on a horizontal orbital microplate shaker at room temperature. Plates were then washed three times (20-fold wash buffer concentrate reconstituted). 25  $\mu$ L of detection antibody solution were added to each well and incubated for 2 hours on a horizontal orbital microplate shaker at room temperature. 150  $\mu$ L of a 2X Read Buffer T were added to each well and the plate was read with a MSD instrument. The average of the duplicate readings for each standard and sample were analysed and analyte concentrations established fitting a 4-parameter logistic calibration curve.

#### *Enzyme-linked immunosorbent assay (ELISA)*

vonWillebrand factor (vWF) and soluble Platelet endothelial cell adhesion molecule-1 (sPECAM1) plasma concentrations were quantified according to the manufacturer's instructions briefly summarised below.

*vonWillebrand Factor (Invitrogen, Thermo fisher)*

Lithium heparin plasma samples were 8000-fold diluted. 100uL of diluted samples were added to each well, standards were diluted according to the protocol, incubated at room temperature for 2.5 hours on a microplate shaker. The following reagents were added sequentially with a washing passage in between: 100 µL of prepared biotin conjugate incubated at room temperature for 1 hour, 100 µL of prepared Streptavidin-HRP solution, incubated for 45 minutes, 100 µL of TMB Substrate, incubated at room temperature for about 45 minutes, avoiding direct exposure to intense light. The enzyme reaction was stopped with 50 µL of Stop Solution. Absorbance was read with a spectro-photometer using 450 nm. Average of the duplicate readings for each standard and sample were analysed and analyte concentrations established fitting a 3<sup>rd</sup> order polynomial calibration curve.

*Soluble CD31/PECAM (Invitrogen, Thermo fisher)*

Lithium heparin plasma samples were 10-fold diluted. 100uL of diluted samples were added to each well, standards were diluted according to the protocol, after adding 50 µL of HRP-Conjugate to all wells, plate was incubated at room temperature for 3 hours on a microplate shaker. After washing, 100 µL of TMB Substrate Solution were added to all wells and plate was incubated at room temperature for about 10 minutes, avoiding direct exposure to intense light. The enzyme reaction was stopped by quickly pipetting 100 µL of Stop Solution. Absorbance was read with a spectro-photometer using 450 nm. Average of the duplicate readings for each standard and sample were analysed and analyte concentrations established fitting a 3<sup>rd</sup> order polynomial calibration curve.

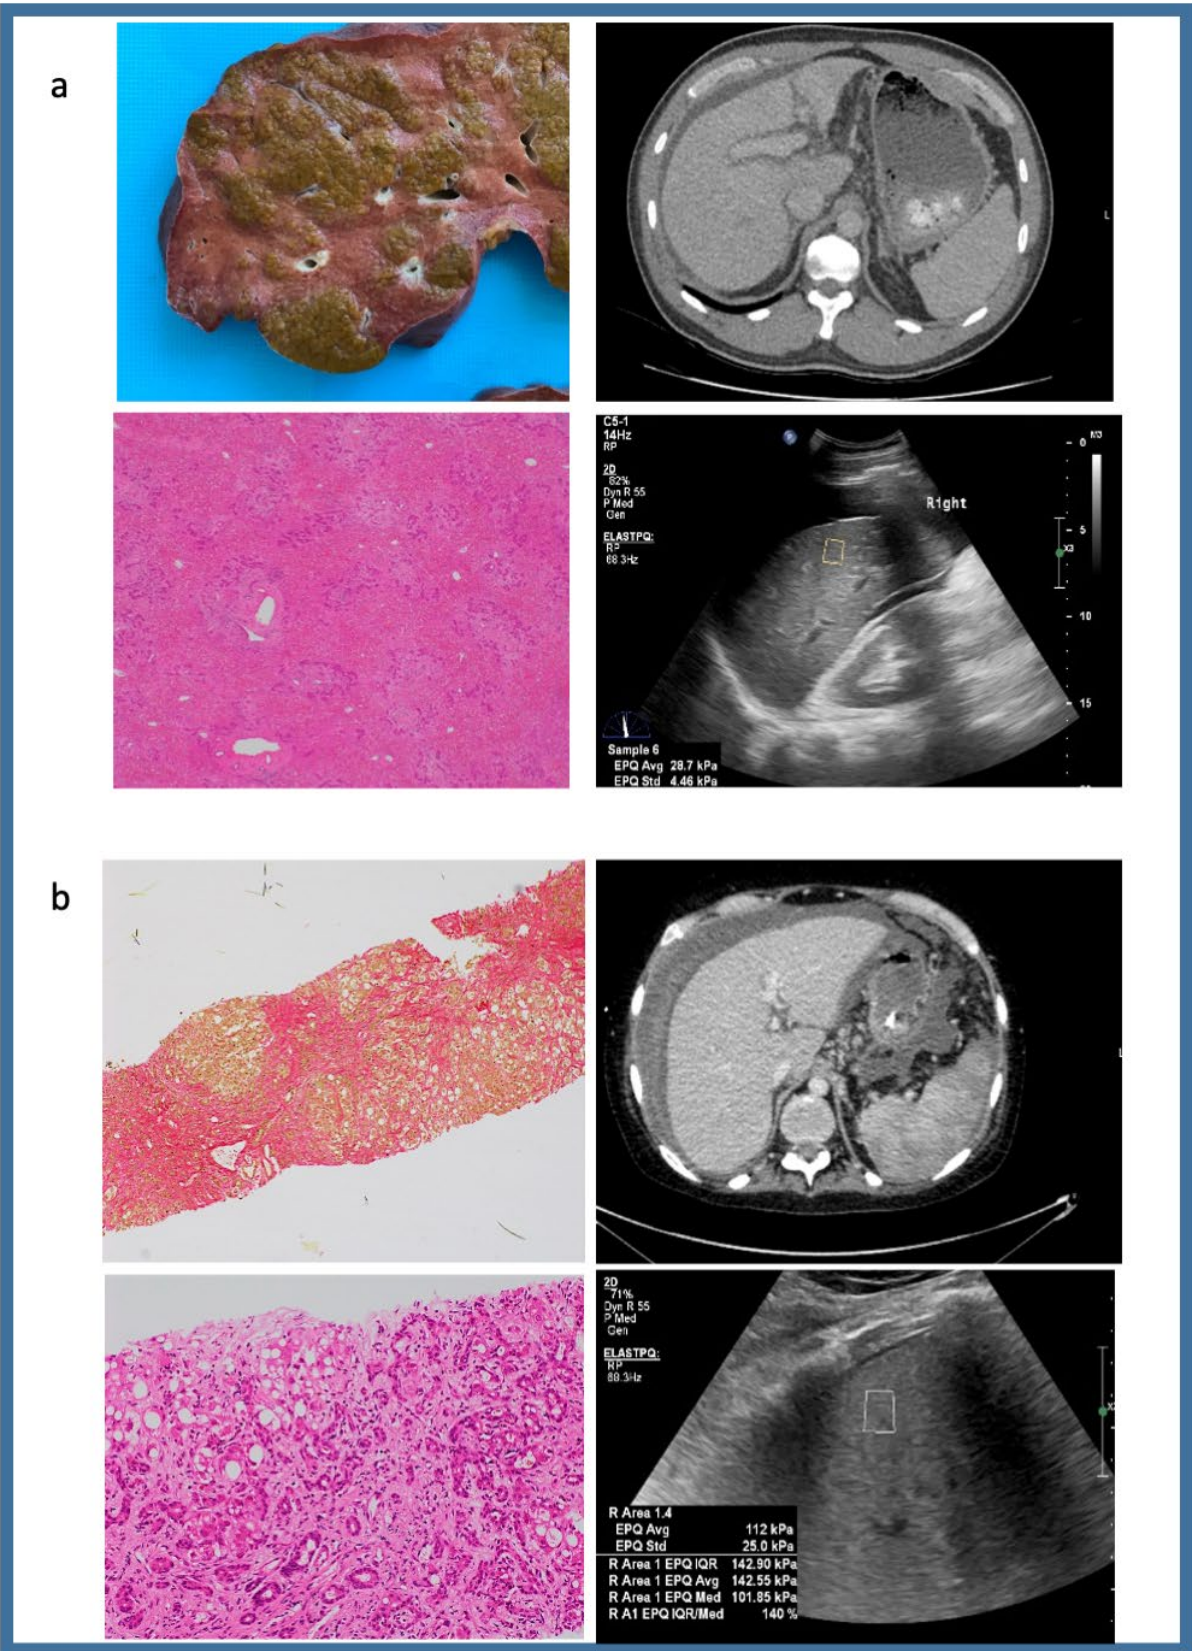

Supplementary Figure 1. Two cases with similar features at CT scan.

- a) Submassive necrosis with map-like nodular areas intermixed with collapse areas. Liver weight 492g. Complete hepatocellular loss with no underlying fibrosis. LSM =28.7kPa±4.46;
- b) Micronodular cirrhosis and pericellular fibrosis (Sirius red). Steatosis, marked Mallory-Denk hyaline, and inflammation (top left). Marked ductular reaction with cholestasis. LSM112kPa±25.

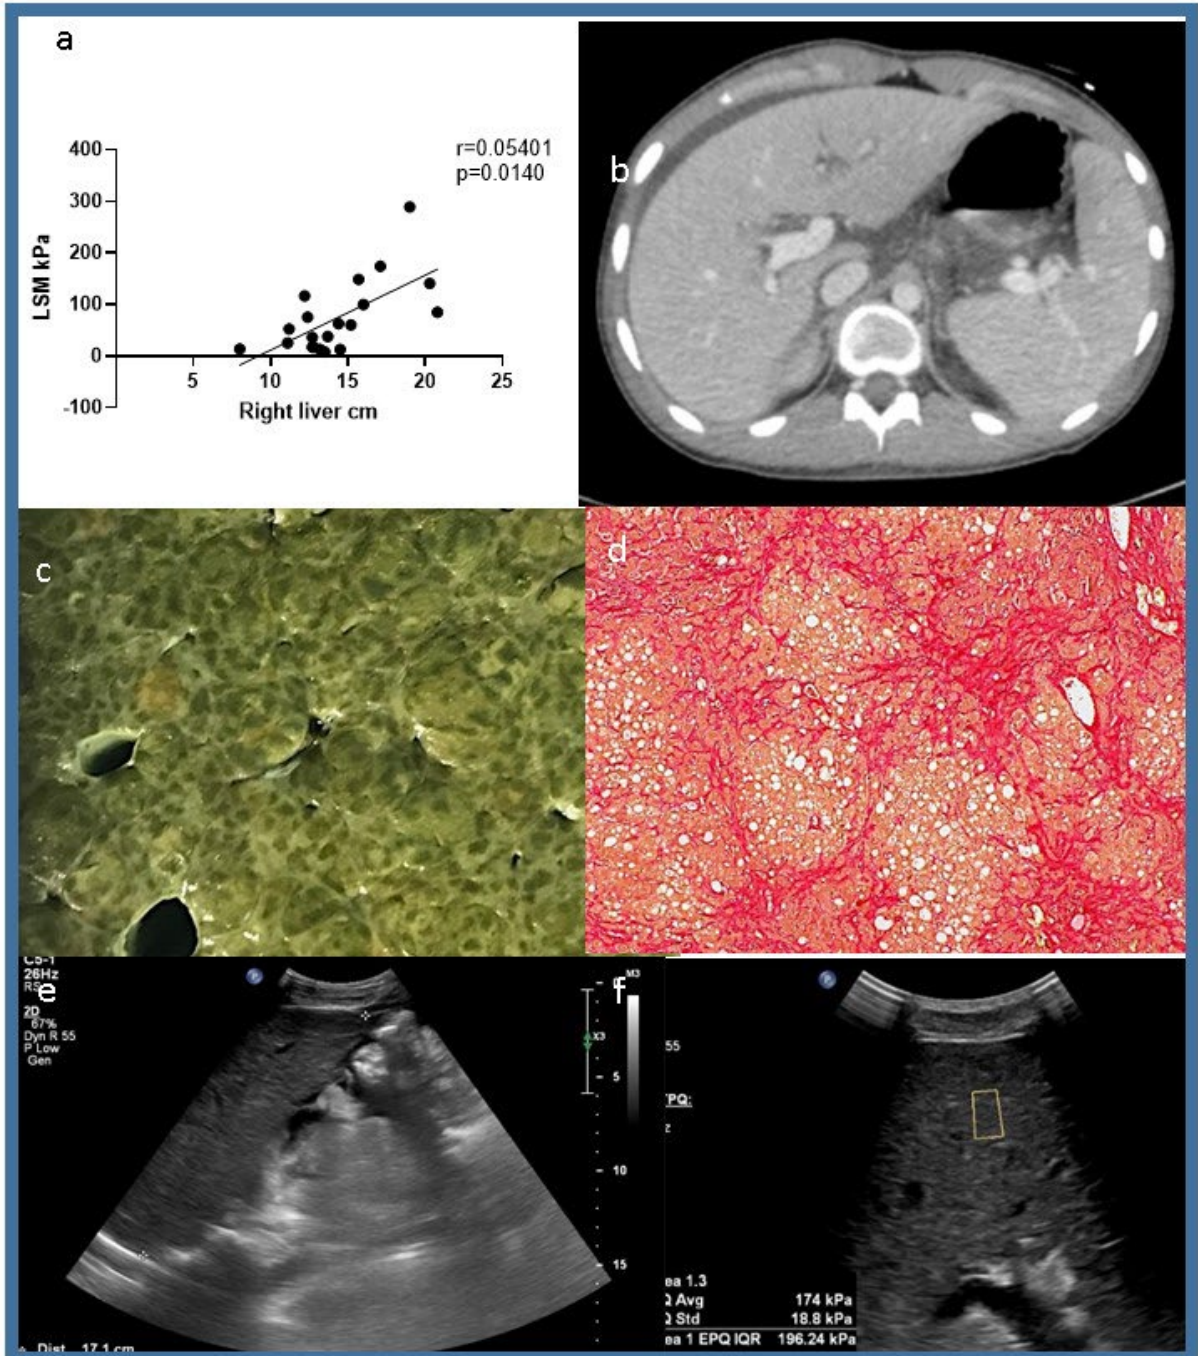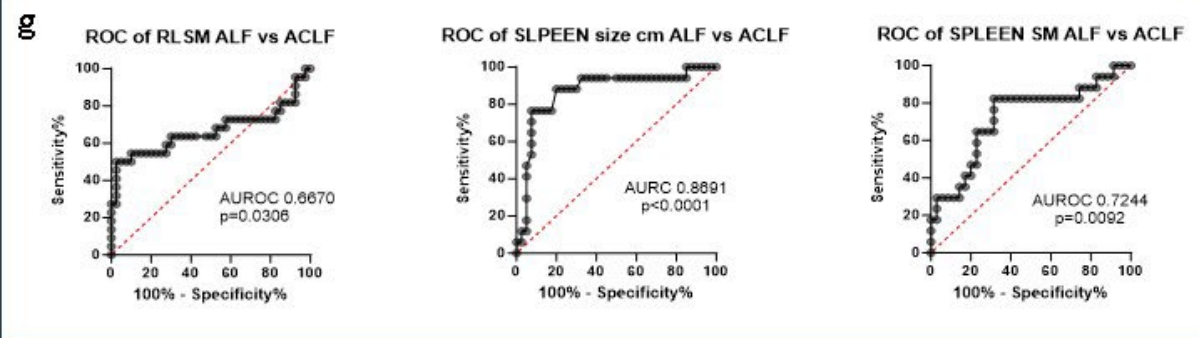

Supplementary Figure 2.

In ACLF, size and stiffness are linearly correlated, (a) Spearman  $r=0.05401$ ,  $p=0.0140$ ;  
Clinical Case showing CT imaging (b) and histology (c and d) in a patient with Wilson's  
disease; Liver size (e) measured as liver longitudinal diameter along an oblique line from the  
right hemi-diaphragm to the inferior tip of the right lobe in midaxillary line and ElastPQ (f)  
measurement showing average of 174kPa in the same patient.  
g) Receiver operating characteristic (ROC) curve for right liver stiffness measurement  
(RLSM), spleen size in cm and spleen stiffness measurement (SM) discriminating between  
ALF and ACLF.

\* $p<0.05$ , \*\* $p<0.01$ , \*\*\* $p<0.001$ , \*\*\*\* $p<0.0001$

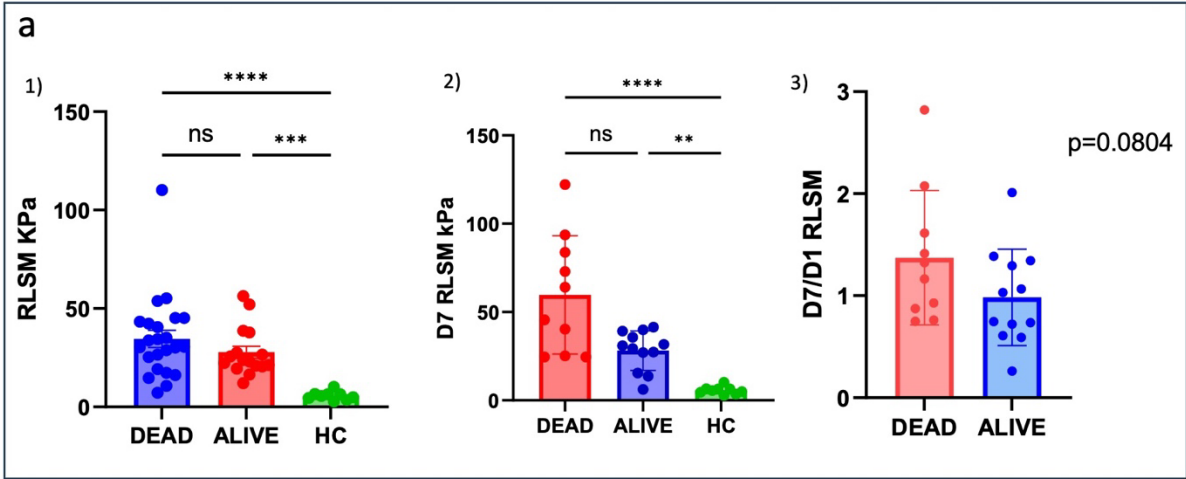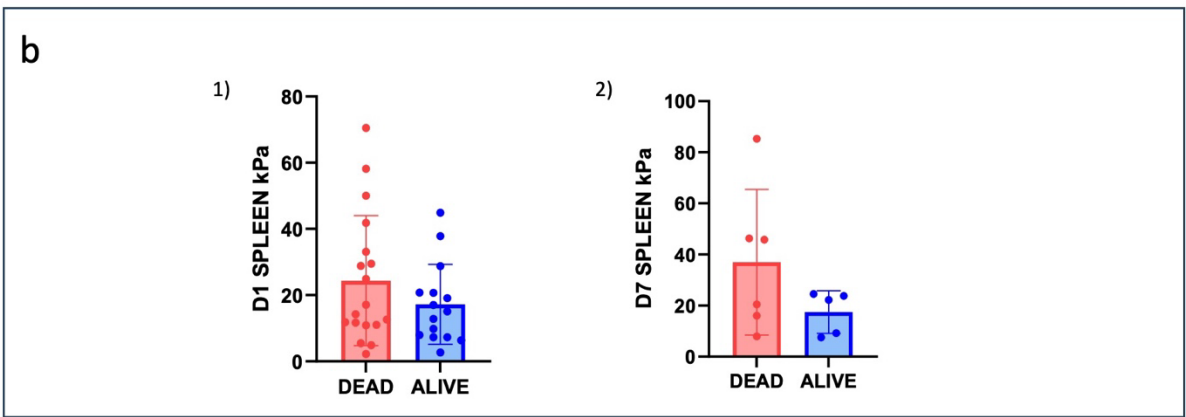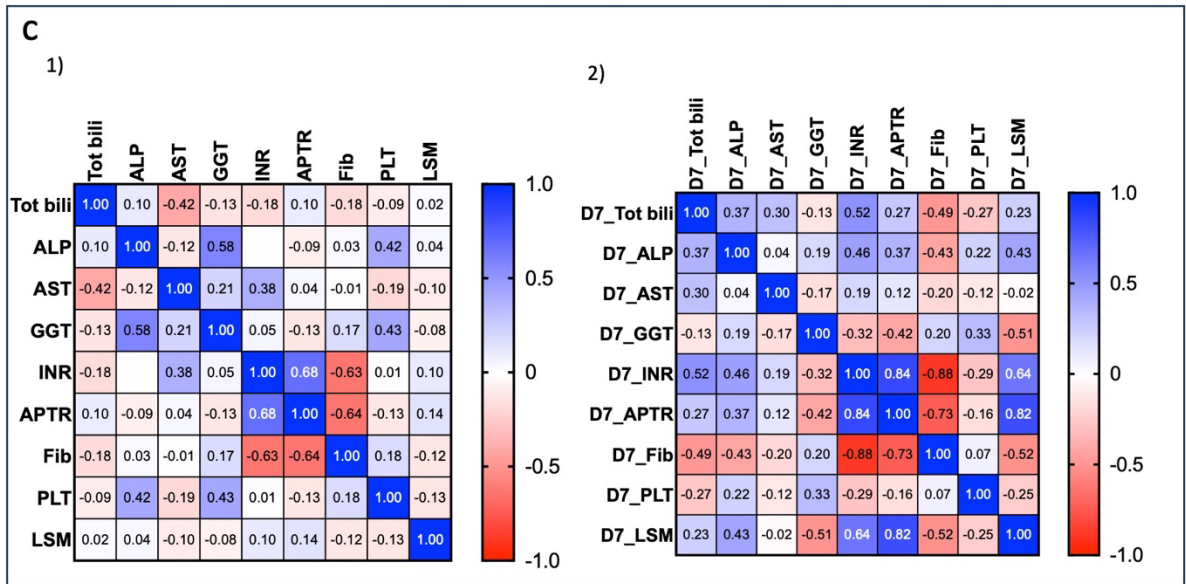

Supplementary Figure 3.

a) 1), At admission to liver intensive care LSM is not different between patients that spontaneously survive vs patients deceased or transplanted in the following 90 days. 2), At day 7 patients with increased LSM have poor prognosis (Kruskal-Wallis with Dunn's Multiple comparisons test). in both cases values are increased compared to healthy controls (HC). 3), the ratio between one week LSM and baseline is also increased in patients with poor prognosis despite not statistically significant ( $p=0.0804$ ) .

b) Baseline spleen stiffness (1) is not different between patients alive at 90 days ( $17.22\pm 12\text{kPa}$ ) and those who die or were transplanted ( $24.37\pm 19.6\text{kPa}$ ), while at day 7 (2) patients with poor prognosis show increased values ( $17.45\pm 8.36$  vs  $36.97\pm 28.48\text{kPa}$ ) .

\* $p<0.05$ , \*\* $p<0.01$ , \*\*\* $p<0.001$ , \*\*\*\* $p<0.0001$ , ns= Not Statistically Significant

c) Correlation matrix showing lack of correlation on day 1 (1) and significant direct correlation of LSM with INR (Spearman  $r=0.6447$ ,  $p=0.0029$ ), APTR ( $r=0.8176$ ,  $p<0.0001$ ) and fibrinogen ( $r=-0.5215$ ,  $p=0.022$ ) on day 7(2) of admission.



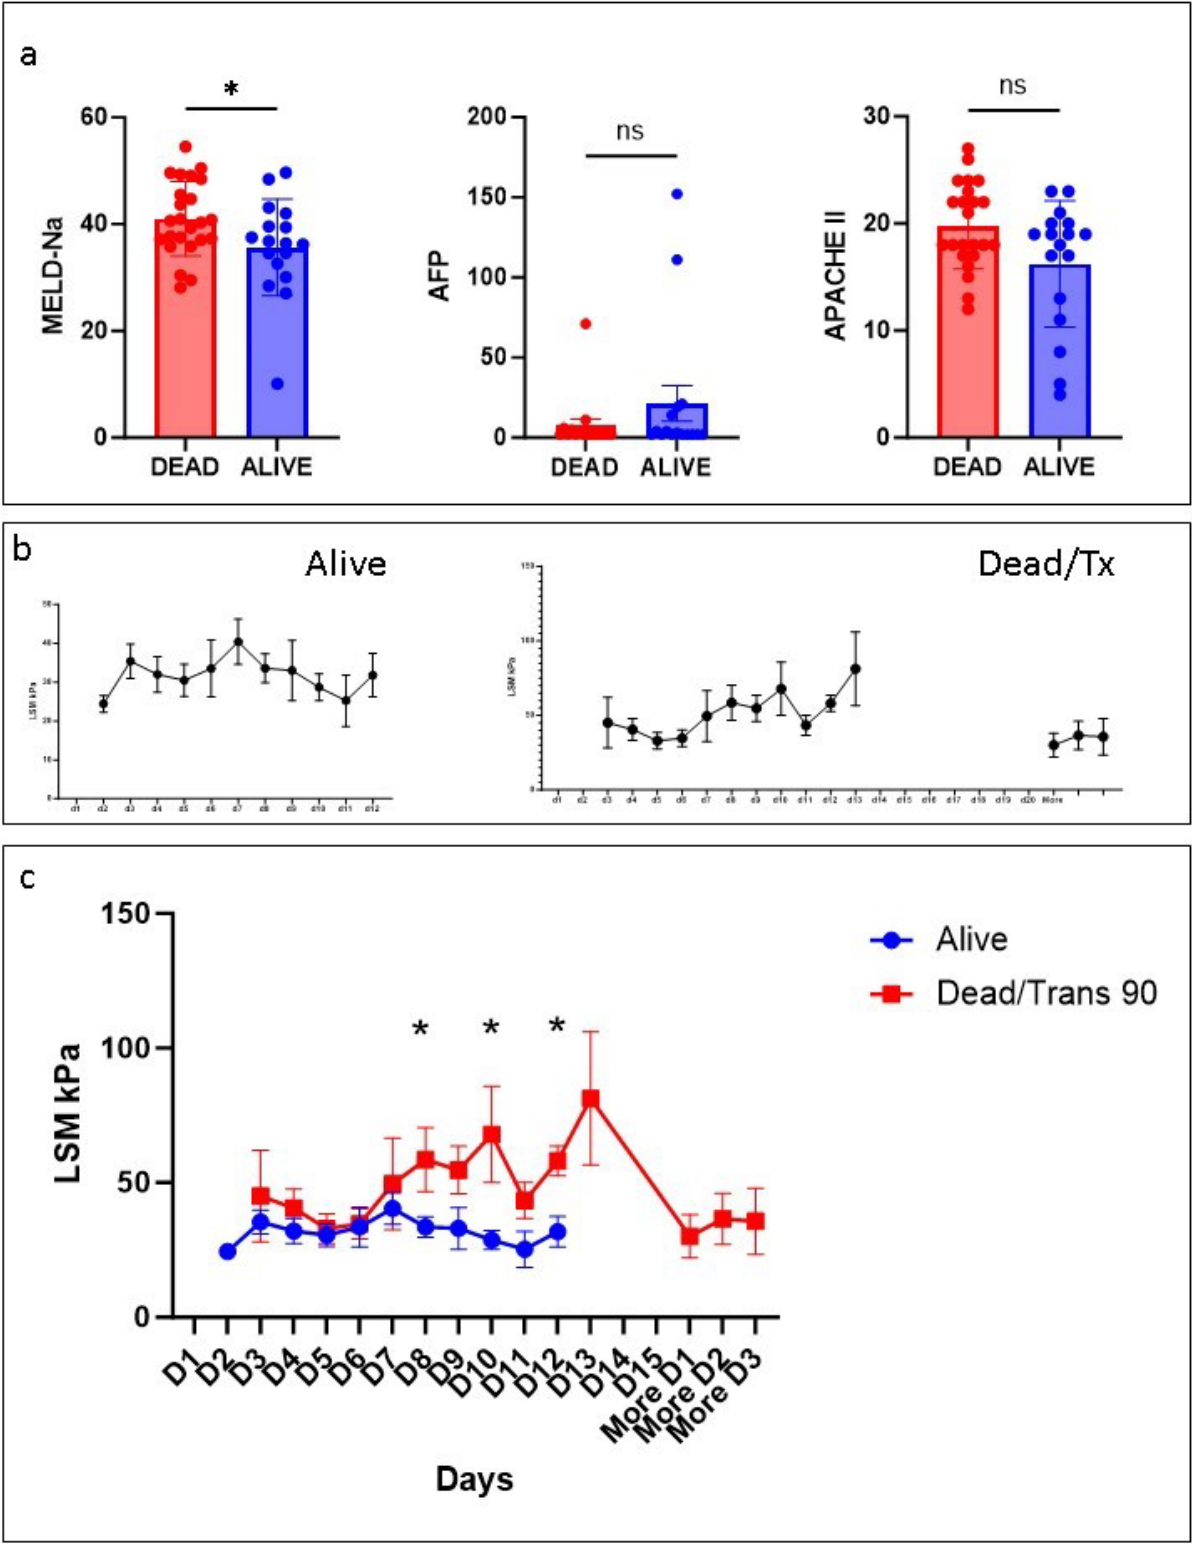

Supplementary Figure 4.

a) Model for End-Stage Liver Disease( MELD)-Sodium (Na) was reduced in patients spontaneously survived, Alpha-fetoprotein (AFP) and the Acute Physiology And Chronic

Health Evaluation (APACHE) II score was not different between the two groups. B) Analysis of liver stiffness measurement (LSM) according to day of illness onset rather than admission to ITU. Acute patients were generally transferred to King's College Hospital on day 2-3 of illness. In the dead/transplant (tx) graph you can see 4 patients were transferred after more than 20 days of illness (subacute liver failure), all of them were transplanted. c) Both curves show LSM in the alive and dead populations (Ordinary two-way ANOVA with Tukey's Multiple comparisons), the difference between the curves is significant at day 8 of disease onset and persists during the illness.

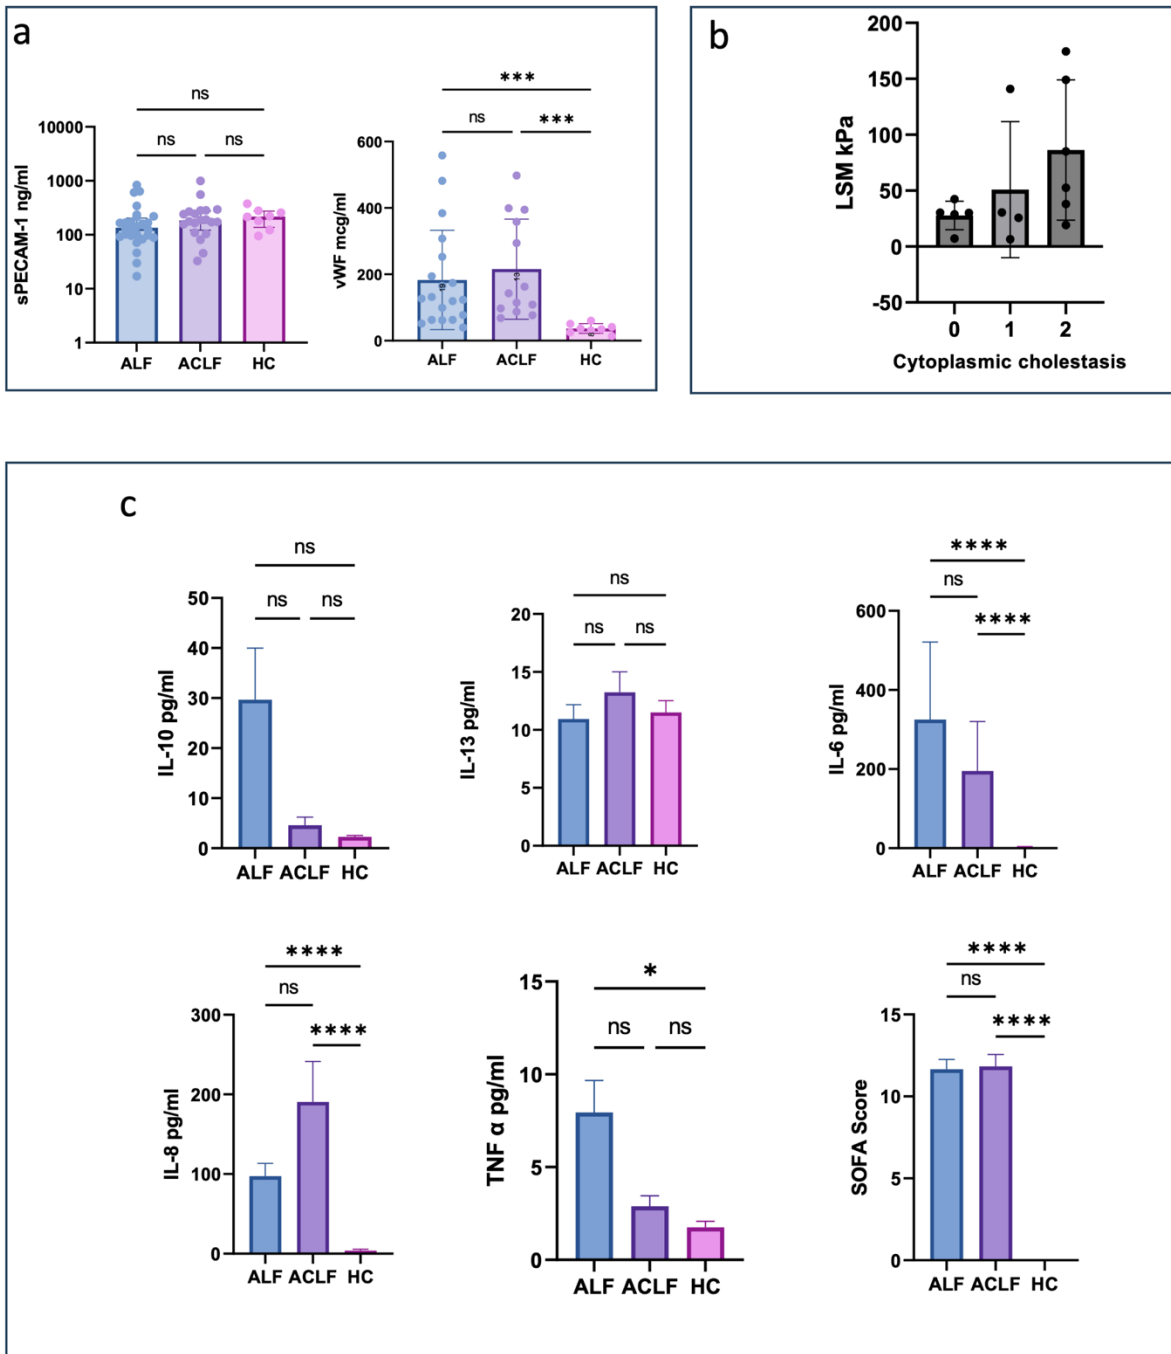

Supplementary Figure 5.

a) Soluble platelet/endothelial cell adhesion molecule (sPECAM-1) was not different between ACLF and HC, while and von Willebrand factor (vWF) was increased in acute liver failure syndromes compared to control HC=8, ALF=20, ACLF=12

b) LSM according to Cytoplasmic cholestasis (0,1,2)



|           |     |     |     |     |    |    |     |    |
|-----------|-----|-----|-----|-----|----|----|-----|----|
| IMET A322 | No  | No  | No  | No  | No | 13 | 8   | 7  |
| IMET A325 | No  | No  | No  | No  | No | 5  | No  | No |
| IMET A327 | No  | No  | No  | No  | No | 1  | No  | No |
| IMET A178 | Yes | No  | Yes | Yes | 2  | 14 | 15  | 2  |
| IMET A214 | Yes | No  | No  | No  | 12 | 24 | 4   | 2  |
| IMET A225 | Yes | No  | Yes | Yes | No | 4  | 5   | 2  |
| IMET A232 | Yes | No  | Yes | Yes | No | 4  | 2   | 2  |
| IMET A235 | Yes | No  | Yes | Yes | No | 7  | 8   | 1  |
| IMET A241 | Yes | No  | Yes | Yes | 10 | 22 | 47  | 20 |
| IMET A260 | Yes | No  | Yes | No  | No | 1  | 18  | No |
| IMET A261 | Yes | No  | No  | No  | No | 3  | 8   | No |
| IMET A288 | Yes | No  | No  | No  | No | 3  | 1No | No |
| IMET A304 | Yes | No  | No  | No  | No | 1  | No  | No |
| IMET A184 | Yes | No  | Yes | Yes | 15 | 21 | 47  | 6  |
| IMET A276 | No  | Yes | Yes | No  | 6  | 2  | 15  | 6  |
| IMET A177 | No  | Yes | Yes | No  | No | No | 2   | No |
| IMET A193 | No  | Yes | Yes | No  | No | 1  | 4   | No |
| IMET A195 | No  | Yes | Yes | No  | 2  | 4  | 6   | 1  |
| IMET A219 | No  | Yes | Yes | No  | No | No | 2   | No |
| IMET A227 | No  | Yes | Yes | No  | No | No | No  | No |
| IMET A237 | No  | Yes | Yes | No  | No | No | No  | No |
| IMET A251 | No  | Yes | Yes | No  | 2  | 8  | 8   | 1  |
| IMET A305 | No  | Yes | No  | No  | No | 2  | 8   | No |
| IMET A315 | No  | Yes | Yes | No  | No | No | 8   | No |
| IMET A316 | No  | Yes | Yes | No  | No | 1  | 6   | No |
| IMET A183 | Yes | Yes | Yes | Yes | No | 10 | 15  | 8  |

Blood product received by each patient during the ITU stay including the referring hospital (until discharge, liver transplant or death)

KCC: King's College Criteria, PLEX: Plasmapheresis, FFP: fresh frozen plasma, RBC: red blood cells, Cryo: cryoprecipitate, PLT: platelets
